# Supplementary material
Source: Elsevier journal article supplement (https://www.sciencedirect.com/science/article/pii/S1138359319303636)
Supplement: mmc1 [file S1138359319303636:mmc1.pdf]

**ENCUESTA MIGRAÑA Y TRABAJO: ESTUDIO DE SITUACIÓN**  
**Tiempo aproximado para responder esta encuesta: 6 minutos**

El objetivo de este estudio es conocer la situación del trabajador con Migraña dentro del mundo del trabajo y comparar la situación en los distintos países participantes.

De esta forma, Y con los datos resultantes, se puede favorecer la puesta en marcha de actuaciones para mejorar el entorno laboral y la máxima integración del trabajador con migraña dentro de las empresas.

Se desea implementar las medidas preventivas y adaptativas con beneficio común para: El trabajador, El sanitario y El empresario

\* Esta encuesta se ha llevado a cabo con el aval científico de la asociación española de especialistas en medicina del trabajo AEEMT.

**COMPRUEBE QUE CUMPLE LOS CRITERIOS DE INCLUSIÓN PARA EL ESTUDIO:**

☐ Su Participación es voluntaria

☐ Conoce que los datos que se obtengan serán de uso confidencial

☐ Cumple criterios de migraña

☐ Está trabajando en el momento de la encuesta, o lo ha estado en el año previo

**CUESTIONES DEL PACIENTE/TRABAJADOR: RELATIVAS A SUS DATOS PERSONALES**

- 1) Edad
  - Menos de 20 años
  - Entre 21-40
  - Entre 41-60
  - Más de 61
- 2) Sexo
  - Hombre
  - Mujer
- 3) Lugar de residencia
  - España
  - Italia
  - Francia
  - Portugal
  - Irlanda
  - Reino Unido
  - Alemania
  - Otro país de la UE
- 4) Características de su localidad de residencia: número aproximado de habitantes
  - Hasta 500 habitantes
  - Desde 500-10.000 habitantes

1

- Desde 10.000-250.000 habitantes
  - Desde 250.000-1 millón de habitantes
  - Más de un millón de habitantes
- 3) Nivel de estudios
    - Elementales
    - Medios
    - Superiores
  - 6) Apoyo que recibe el trabajador de su entorno durante las crisis de migraña
    - Bueno
    - Regular
    - Malo
  - 7) Ámbito en el que vive
    - Rural (pueblo)
    - Urbano (capital)

**CUESTIONES DEL PACIENTE/TRABAJADOR: RELATIVAS A SU MIGRAÑA**

- 8) Tipo de Migraña que padece
  - Con aura
  - Sin aura
  - Ambos tipos
  - Crónica/Cronificada
- 9) Duración de las Crisis
  - Menos de 4 horas
  - Entre 4-6 horas
  - Más de 6 horas
- 10) Frecuencia de las crisis
  - Menos de 3/mes
  - Entre 3-6/mes
  - Más de 6/mes
- 11) Control Médico (MARCAR LAS OPCIONES NECESARIAS, PUEDEN SER MÁS DE UNA)
  - Por neurólogo
  - Por médico general/de familia/atención primaria
  - Por médico del trabajo
  - Por otro médico/otra especialidad
  - Por enfermería
  - No llevo control médico/ autocontrol
- 12) Tratamiento Preventivo de las crisis de migraña (MARCAR LAS OPCIONES NECESARIAS, PUEDEN SER MÁS DE UNA)
  - llevo un tratamiento preventivo siempre
  - llevo un tratamiento preventivo en temporadas
  - llevo varios tratamientos preventivos siempre
  - llevo varios tratamientos preventivos en temporadas
  - no llevo tratamiento preventivo
  - no sé qué es un tratamiento preventivo

13) Tratamiento para el dolor cuando tiene crisis de migraña (MARCAR LAS OPCIONES NECESARIAS, PUEDEN SER MÁS DE UNA)

2

- Con analgésicos simples
  - Con antiinflamatorios
  - Con triptanes
  - Con otros tratamientos sintomáticos
  - Con varios tratamientos sintomáticos no nombrados anteriormente
  - No llevo tratamiento sintomático
  - No sé qué es un tratamiento sintomático
- 14) ¿Usa otros tratamientos complementarios? (dietas, fisioterapia, mindfulness...etc.)
- . Si
- . No

**CUESTIONES DEL PACIENTE/TRABAJADOR: RELATIVAS A SU TRABAJO**

- 15) Empresa-sector de trabajo actual del trabajador
  - Autónoma/por cuenta propia
  - Por cuenta ajena
    - Construcción
    - Industria
    - Sanitario
    - Hostelería
    - Administración pública
    - Servicios comerciales
    - Otros servicios: abogado, ingeniero, arquitecto, consultor, asesor
    - Docencia
    - Otros sectores profesionales
- 16) Puesto de Trabajo actual del trabajador
  - Administrativo
  - Comercial
  - Limpieza
  - Mantenimiento
  - Fuerzas de orden público
  - Sanitario
  - Operario de la industria
  - Dependiente/atención al cliente
  - Mando intermedio
  - Puesto directivo
  - Profesor
  - Otros
- 17) Riesgos del puesto que desempeña (MARCAR LAS OPCIONES NECESARIAS, PUEDEN SER MÁS DE UNA)
  - Manipulación de cargas
  - Exposición a ruido
  - Exposición a sustancias químicas
  - Estrés laboral
  - Turnos de trabajo rotatorios o nocturno
  - Conducción de vehículos (más de 1/3 de la jornada laboral)
  - Vibraciones

3

- Trabajos que requieren gran atención o de precisión
  - Manejo de maquinaria de riesgo (carritillas elevadoras o similares)
  - Malas condiciones medioambientales (temperatura, humedad)
  - Ergonomía inadecuada (mobiliario y herramientas o utensilios de trabajo no adecuados)
  - Uso de Pantallas de Visualización de Datos/ordenadores
  - Otros
  - Desconozco los riesgos del puesto
- 18) Tamaño de la empresa donde trabaja
- Microempresa (con menos de 10 trabajadores)
  - Pequeña empresa (entre 11 a 49 trabajadores)
  - Mediana empresa (entre 50 a 250 trabajadores)
  - Empresa grande (más de 250 trabajadores)
- 19) Ubicación de la empresa donde trabaja
- Urbano (capital o polígono de la capital)
  - Rural (pueblo o polígono industrial aislado)
- 20) Servicio de prevención en la empresa en la que trabaja
- Propio (de la empresa)
  - Ajeno (concertado con otra empresa)
  - Desconozco el tipo de servicio de prevención
- 21) Servicio Médico en la empresa en la que trabaja
- Si hay, a jornada completa
  - Si hay, a tiempo parcial
  - No se dispone en la empresa
  - Desconozco si existe servicio médico en la empresa
- 22) Reconocimientos periódicos de vigilancia de la salud en la empresa en que trabaja
- Si, Voy todos los años
  - Si, Voy cada dos años
  - Si, Voy esporádicamente
  - No voy nunca
  - Desconozco si hay o acude a los reconocimientos de vigilancia de la salud
- 23) Opciones de gestión de la empresa
- ¿La migraña le ha impedido acceder a algún trabajo?
    - Si
    - No
  - ¿Le han despedido del trabajo o no renovado su contrato por padecer migraña?
    - Si
    - No
  - ¿Ha tenido dificultades en su empresa por padecer migraña (amonestaciones, sanción por bajo rendimiento, ausencias del trabajo o dudas sobre sus ausencias del trabajo por crisis de migraña...)?
    - Si
    - No
  - En el caso de que haya tenido dificultades o conflicto laboral por limitaciones/pérdida de productividad para realizar adecuadamente su trabajo por padecer migraña, ¿a qué frecuencia?
    - diariamente
    - semanalmente
    - alguna vez al mes
    - de forma muy esporádica
    - No repercute en mi trabajo

- ¿Ha solicitado ser considerado como trabajador especialmente sensible por su migraña con relación al puesto de trabajo que desempeña? (en España art. 23 LPRL)
    - Si
    - No
    - No sé lo que es eso
  - ¿Ha solicitado alguna vez modificación de sus condiciones de trabajo por la migraña (de lugar, horario, funciones asignadas, etc.)?
    - Si
    - No
  - ¿Ha solicitado alguna vez cambio de puesto de trabajo por la migraña?
    - Si
    - No
  - Si lo ha solicitado ¿Le han adaptado o ajustado de alguna forma el puesto de trabajo en su empresa por la migraña (cambio de puesto o de lugar, horario, funciones asignadas, etc.)?
    - Si
    - No
  - ¿Se ha sentido comprendido y apoyado por su empresa por las limitaciones que implica la migraña?
    - Si
    - No
  - ¿Se ha sentido comprendido y apoyado por sus compañeros en relación a las limitaciones que implica la migraña?
    - Si
    - No
- 24) Percepción personal de su capacidad laboral los días sin migraña (autopercepción)
- Los días que usted **NO SUFRE UNA CRISIS DE MIGRAÑA**: ¿se considera limitado para realizar adecuadamente su trabajo?
    - Si, diariamente
    - Si, semanalmente
    - Si, alguna vez al mes
    - Si, pero de forma muy esporádica
    - No repercute en mi trabajo
- 25) Percepción personal de su capacidad laboral los días sin migraña (autopercepción)
- Los días que **NO SUFRE UNA CRISIS**: ¿Para qué trabajos se considera limitado por las secuelas de la migraña o sus tratamientos?
    - Para ninguno, puedo realizar cualquier trabajo
    - Me considero limitado para algunos trabajos
    - Me considero limitado para todos los trabajos
- 26) Percepción personal de su capacidad laboral los días que sufre migraña (autopercepción)
- Los días que usted **SÍ TIENE UNA CRISIS DE MIGRAÑA**: ¿Considera que la migraña puede llegar a imposibilitarle la realización de su trabajo?
    - Si
    - No
- 27) ¿Considera que por ser afectado de migraña es usted una persona discapacitada?:
- No
  - Si, pero solo durante las crisis
  - Si, todo el tiempo
- 28) ¿Considera que el hecho de trabajar aunque sufra migraña le facilita la integración social?

- Si
- No

29) ¿Considera que el mundo del trabajo facilita la integración de la persona con Migraña?

- Si
- No

30) ¿Qué pediría a las empresas para mejorar la situación de los trabajadores que como usted sufren de migraña? (MARCAR LAS OPCIONES NECESARIAS, PUEDEN SER MÁS DE UNA)

- Flexibilidad horaria
- Opciones de Adaptaciones en el puesto de trabajo
- Opciones de Cambios de puesto de trabajo
- Trabajar desde casa/teletrabajo
- Tener en la empresa Zonas de descanso/silencio
- Tener Servicio Sanitario en mi empresa (médico-enfermería)
- Varias o todas ellas

GRACIAS POR SU COLABORACIÓN
